# Supplementary material for: Asymmetric coordination activated lattice oxygen in perovskite ferrites for selective anaerobic oxidation of methane
Source: Royal Society of Chemistry journal article supplement (doi:10.1039/d2ta09187a), 2023-01-01
Supplement: d2ta09187a1.pdf [file d2ta09187a1.pdf]

## Supplementary information

# Asymmetric coordination activated lattice oxygen in perovskite ferrites for selective anaerobic oxidation of methane

*Wenxi Chang<sup>a,b,†</sup>, Yuming Gao<sup>c,†</sup>, Jiahui He<sup>a,b</sup>, Xue Xia<sup>a,b</sup>, Chuande Huang<sup>a,\*</sup>, Yue Hu<sup>a,d</sup>, Weibin Xu<sup>a,d</sup>, Bo Jiang<sup>c,\*</sup>, Yujia Han<sup>a,d</sup>, Yanyan Zhu<sup>b,\*</sup>, Xiaodong Wang<sup>a,\*</sup>*

<sup>a</sup>CAS Key Laboratory of Science and Technology on Applied Catalysis, Dalian Institute of Chemical Physics, Chinese Academy of Sciences, Dalian 116023, China

<sup>b</sup>College of Chemical Engineering, Northwest University, Xi'an 710069, China

<sup>c</sup>Key Laboratory of Ocean Energy Utilization and Energy Conservation of Ministry of Education, Dalian University of Technology, Dalian 116023, China

<sup>d</sup>University of Chinese Academy of Sciences, Beijing 100049, China

<sup>†</sup>These authors contributed equally to this work.

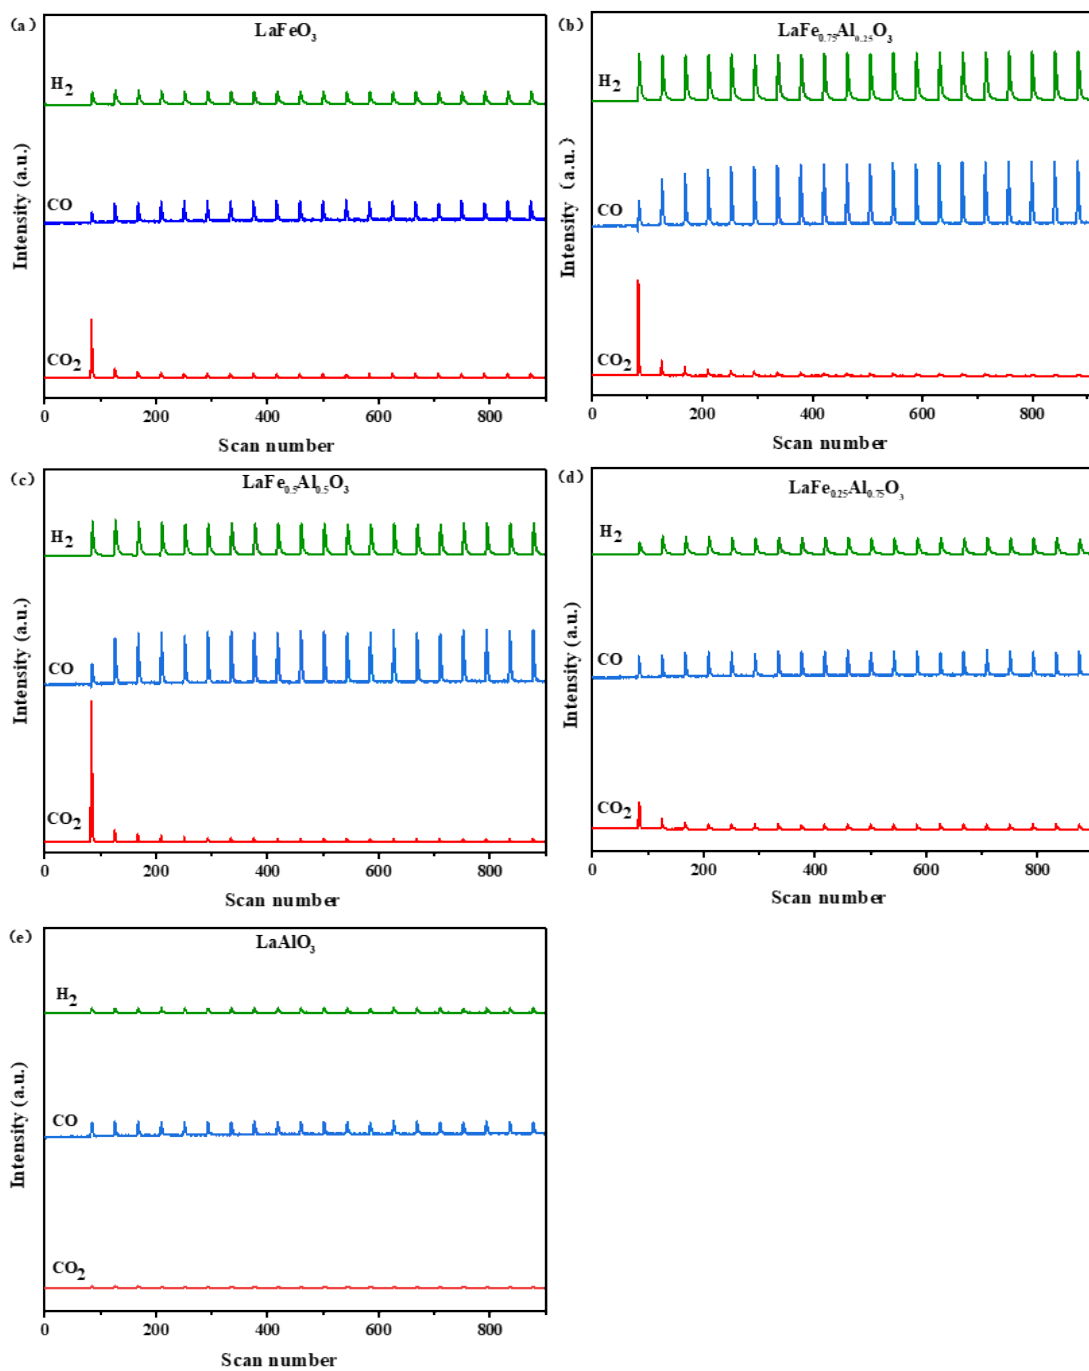

**Figure S1.** Methane pulse reaction performance over LaFe<sub>1-x</sub>Al<sub>x</sub>O<sub>3</sub> ( $0 \leq x \leq 1.0$ ) oxides at 700 °C.

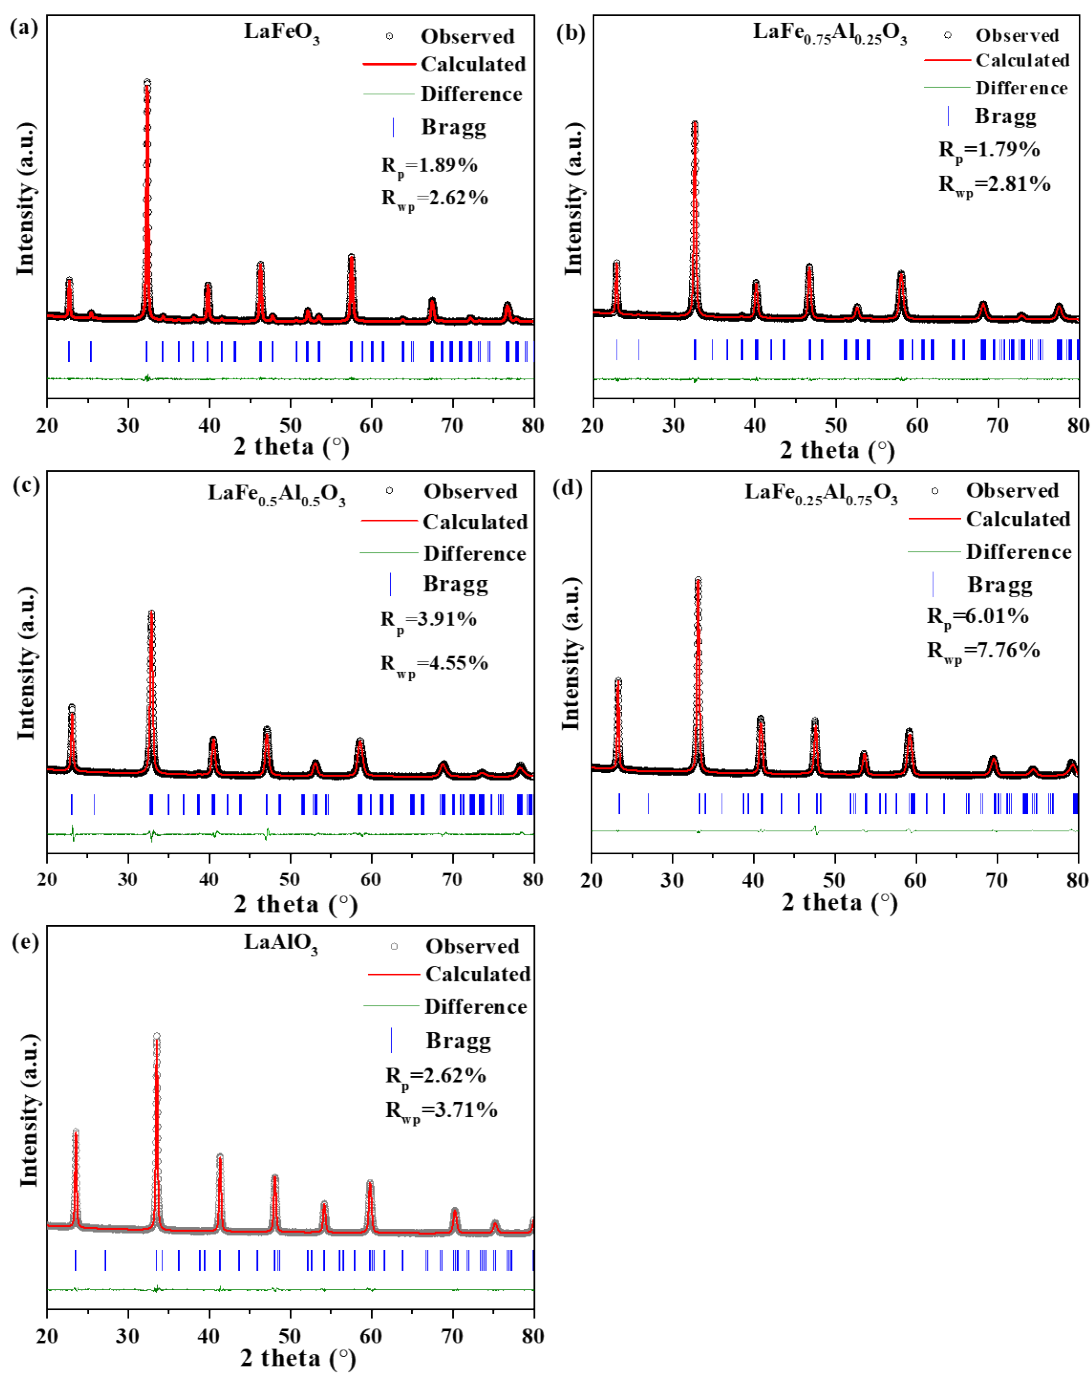

**Figure S2.** Rietveld refinement results of  $\text{LaFe}_{1-x}\text{Al}_x\text{O}_3$  ( $0 \leq x \leq 1.0$ ) oxides.

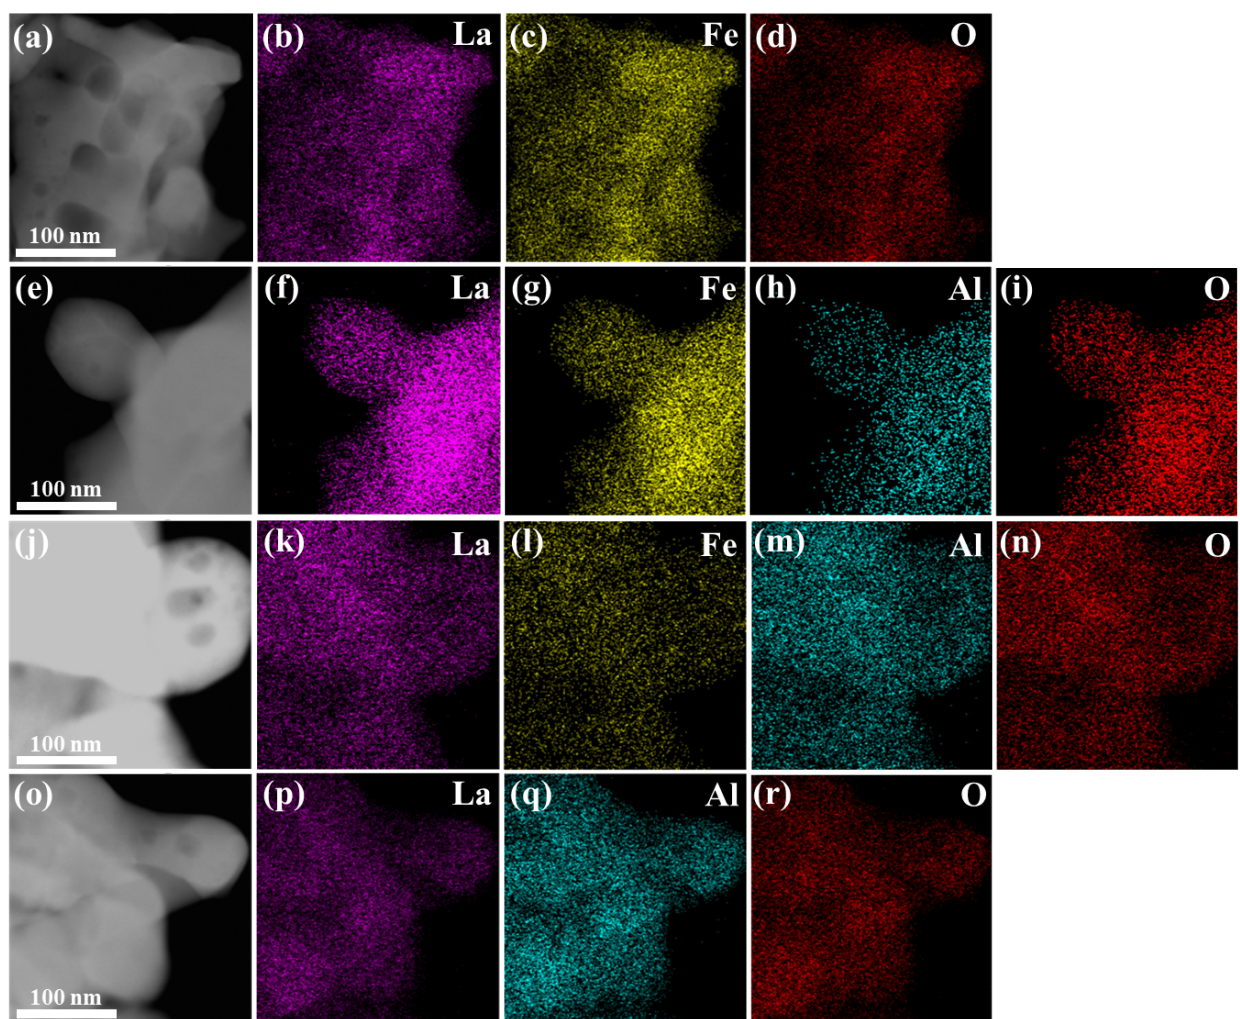

**Figure S3.** STEM images and corresponding element distribution of (a-d)  $\text{LaFeO}_3$ , (e-i)  $\text{LaFe}_{0.75}\text{Al}_{0.25}\text{O}_3$ , (j-n)  $\text{LaFe}_{0.25}\text{Al}_{0.75}\text{O}_3$ , and (o-r)  $\text{LaAlO}_3$ .

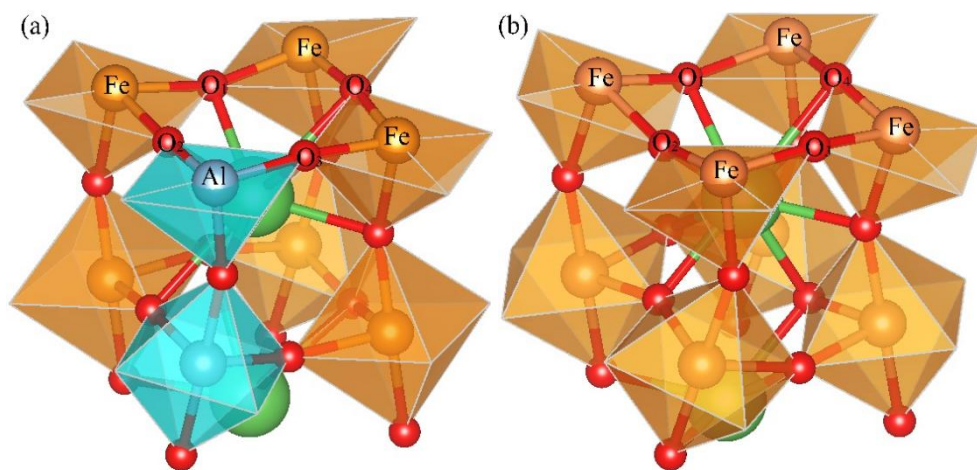

**Figure S4.** Schematic representations of local structures around Fe on (a)  $\text{LaFe}_{0.5}\text{Al}_{0.5}\text{O}_3$  and (b)  $\text{LaFeO}_3$ .

**Table S1.** Basic Parameters for  $\text{LaFe}_{1-x}\text{Al}_x\text{O}_3$  ( $0 \leq x \leq 1$ ) Oxides

| Samples                                | $\text{LaFeO}_3$                    | $\text{LaFe}_{0.75}\text{Al}_{0.25}\text{O}_3$ | $\text{LaFe}_{0.5}\text{Al}_{0.5}\text{O}_3$ | $\text{LaFe}_{0.25}\text{Al}_{0.75}\text{O}_3$ | $\text{LaAlO}_3$                     |
|----------------------------------------|-------------------------------------|------------------------------------------------|----------------------------------------------|------------------------------------------------|--------------------------------------|
| Space Group                            | Pnma                                | Pnma                                           | Pnma                                         | R-3ch                                          | R-3ch                                |
| Lattice Parameters (Å)                 | a= 5.5640<br>b= 7.8540<br>c= 5.5580 | a= 5.4975<br>b= 7.7854<br>c= 5.5286            | a= 5.4550<br>b= 7.7289<br>c= 5.4831          | a= 5.3811<br>b= 5.3811<br>c= 13.2424           | a= 5.3618<br>b= 5.3618<br>c= 13.1326 |
| Average B-O length (Å)                 | 2.0037                              | 1.9696                                         | 1.9489                                       | 1.9074                                         | 1.8966                               |
| Average B-O-B Bond angle (°)           | 159.2                               | 164.7                                          | 168.0                                        | 174.9                                          | 176.3                                |
| Surface area ( $\text{m}^2/\text{g}$ ) | 9.8                                 | 7.6                                            | 5.5                                          | 6.6                                            | 9.8                                  |

**Table S2.** Fitted O 1s data for  $\text{LaFe}_{1-x}\text{Al}_x\text{O}_3$  ( $0 \leq x \leq 1.0$ ) oxides.

| Samples  | Binding energy (eV) |              | Ratio of $\text{O}_A/\text{O}_L$ |
|----------|---------------------|--------------|----------------------------------|
|          | $\text{O}_A$        | $\text{O}_L$ |                                  |
| x = 0    | 531.36              | 529.04       | 1.23                             |
| x = 0.25 | 531.35              | 529.13       | 1.04                             |
| x = 0.5  | 531.37              | 529.26       | 0.87                             |
| x = 0.75 | 531.38              | 529.31       | 0.66                             |
| x = 1.0  | 531.38              | 529.34       | 0.64                             |

**Table S3.** Symmetry assignment for Raman phonon modes of LaFeO<sub>3</sub>.

| Raman shift (cm <sup>-1</sup> ) | Assignment          | Atomic motion                                           |
|---------------------------------|---------------------|---------------------------------------------------------|
| 139                             | B <sub>2g</sub> (1) | A(z), out-of-phase                                      |
| 157                             | B <sub>2g</sub> (2) | A(x), out-of-phase                                      |
| 179                             | A <sub>g</sub> (1)  | [010] <sub>pc</sub> FeO <sub>6</sub> rotation, in-phase |
| 266                             | A <sub>g</sub> (2)  | O <sub>1</sub> x-z plane                                |
| 294                             | A <sub>g</sub> (3)  | [101] <sub>pc</sub> FeO <sub>6</sub> bending, in-phase  |
| 415                             | B <sub>2g</sub> (3) | O-Fe-O scissor like bending                             |
| 432                             | A <sub>g</sub> (4)  | Fe-O stretching                                         |



**Table S4.** Basic parameters for  $\text{LaFe}_{0.5}\text{Al}_{0.5}\text{O}_3$  and  $\text{LaFeO}_3$  obtained by DFT calculations

| Parameters       |                       | $\text{LaFe}_{0.5}\text{Al}_{0.5}\text{O}_3$ | $\text{LaFeO}_3$ |
|------------------|-----------------------|----------------------------------------------|------------------|
| bond length (Å)  | Fe–O <sub>1</sub>     | 1.96 Å                                       | 1.97 Å           |
|                  | Fe–O <sub>2</sub>     | 2.02 Å                                       | 2.10 Å           |
|                  | Fe–O <sub>3</sub>     | 1.91 Å                                       | 2.10 Å           |
|                  | Fe–O <sub>4</sub>     | 1.89 Å                                       | 1.89 Å           |
|                  | average               | 1.95 Å                                       | 2.02 Å           |
| bond angle (deg) | Fe–O <sub>1</sub> –Fe | 159.88                                       | 158.80           |
|                  | Fe–O <sub>2</sub> –Fe | 172.53                                       | 158.80           |
|                  | Fe–O <sub>3</sub> –Fe | 172.54                                       | 162.31           |
|                  | Fe–O <sub>4</sub> –Fe | 172.22                                       | 162.31           |
|                  | average               | 169.30                                       | 160.55           |

**Table S5.** Calculated stability of chemisorbed \*CH<sub>3</sub> and \*H on Fe-O or Al-O of Fe-O-Fe and Fe-O-Al motif.

| Interaction                                   | Energy (eV) |
|-----------------------------------------------|-------------|
| *CH <sub>3</sub> on Fe and *H on O of Fe-O-Fe | -3.21       |
| *CH <sub>3</sub> on Fe and *H on O of Fe-O-Al | -3.71       |
| *CH <sub>3</sub> on Al and *H on O of Fe-O-Al | -1.72       |
